# Supplementary material for: Efficacy of Immunotherapy Combined with Antiangiogenic Therapy in Treatment-Failure Patients with Advanced Carcinoma Ex Pleomorphic Adenoma of the Submandibular Gland: A Case Report
Source: MDPI journal article supplement (doi:10.3390/curroncol29090498), 2022-09-01
Supplement: s1 [file s1]

Table S1 Summary of histological types of salivary gland cancers (SGCs) and advances in immunotherapy and antiangiogenic therapy

| Histological Subtypes *                     | Current treatment principle                                                                                                                                              | Study                    | Histological subtypes                                           | Therapy                             | ORR (%) |
|---------------------------------------------|--------------------------------------------------------------------------------------------------------------------------------------------------------------------------|--------------------------|-----------------------------------------------------------------|-------------------------------------|---------|
| Mucoepidermoid carcinoma (MEC)              | ①For resectable SGCs, the standard of care is surgical resection with or without postoperative radiotherapy.<br>②For advanced SGCs, there is no proven standard of care. | Immunotherapy            |                                                                 |                                     |         |
| Adenoid cystic carcinoma (ACC)              |                                                                                                                                                                          | Niwa et al. [12]         | SDC, Adenocarcinoma, ACC, MEC                                   | Nivolumab                           | 4.2     |
| Acinic cell carcinoma (AcCC)                |                                                                                                                                                                          | Cohen et al. [13]        | Adenocarcinoma, MEC, Undifferentiated carcinoma, SCC, ACC       | Pembrolizumab                       | 12      |
| Polymorphous adenocarcinoma                 |                                                                                                                                                                          |                          |                                                                 |                                     |         |
| Clear cell carcinoma (CCC)                  |                                                                                                                                                                          |                          |                                                                 |                                     |         |
| Basal cell adenocarcinoma                   |                                                                                                                                                                          |                          |                                                                 |                                     |         |
| Intraductal carcinoma                       |                                                                                                                                                                          |                          |                                                                 |                                     |         |
| Adenocarcinoma, not otherwise specified     |                                                                                                                                                                          |                          |                                                                 |                                     |         |
| Salivary duct carcinoma (SDC)               |                                                                                                                                                                          | Mahmood et al. [14]      | ACC                                                             | Pembrolizumab vs Pembrolizumab + RT | 0       |
| Myoepithelial carcinoma (MECA)              |                                                                                                                                                                          |                          |                                                                 |                                     |         |
| Epithelial-myoepithelial carcinoma (EMC)    |                                                                                                                                                                          | Rodriguez et al. [15]    | ACC, AcCC, MEC, Adenocarcinoma, LEC                             | Pembrolizumab + Vorinostat          | 16      |
| Carcinoma ex pleomorphic adenoma (Ca ex PA) |                                                                                                                                                                          |                          |                                                                 |                                     |         |
| Secretory carcinoma                         |                                                                                                                                                                          |                          |                                                                 |                                     |         |
| Sebaceous carcinoma                         |                                                                                                                                                                          |                          |                                                                 |                                     |         |
| Carcinosarcoma                              |                                                                                                                                                                          | Antiangiogenic therapy   |                                                                 |                                     |         |
| Poorly differentiated carcinoma             |                                                                                                                                                                          | Tchekmedyian et al. [16] | ACC                                                             | Lenvatinib                          | 15.6    |
| Undifferentiated carcinoma                  |                                                                                                                                                                          | Locati et al. [17]       | ACC, Adenocarcinoma, Poorly differentiated carcinoma, AcCC, CCC | Axitinib                            | 8       |
| Large cell neuroendocrine carcinoma         |                                                                                                                                                                          |                          |                                                                 |                                     |         |
| Small cell neuroendocrine carcinoma         |                                                                                                                                                                          |                          |                                                                 |                                     |         |
| Lymphoepithelial carcinoma (LEC)            |                                                                                                                                                                          |                          |                                                                 |                                     |         |
| Squamous cell carcinoma                     |                                                                                                                                                                          |                          |                                                                 |                                     |         |
| Oncocytic carcinoma                         |                                                                                                                                                                          |                          |                                                                 |                                     |         |

|                                                |                                           |                                                                                   |                               |     |
|------------------------------------------------|-------------------------------------------|-----------------------------------------------------------------------------------|-------------------------------|-----|
| Uncertain malignant potential<br>Sialoblastoma | Locati et al. [18]                        | ACC, MEC,<br>Adenocarcinomas,<br>SDC, Poorly<br>differentiated<br>carcinoma, MECA | Sorafenib                     | 16  |
|                                                | Chau et al. [19]                          | ACC                                                                               | Sunitinib                     | 0   |
|                                                | Keam et al. [20]                          | ACC                                                                               | Dovitinib                     | 3.1 |
|                                                | Immunotherapy plus antiangiogenic therapy |                                                                                   |                               |     |
|                                                | NCT04209660[21]                           | ACC and Other<br>SGCs                                                             | Lenvatinib +<br>Pembrolizumab | NR  |

Abbreviation: ORR: objective response rate; NR: Not Reported. \*Histological classification of Salivary gland cancers according to the 2017 WHO classification of head and neck cancers.
